# Supplementary material
Source: publisher figshare collection journal article supplement (https://acs.figshare.com/ndownloader/files/31771396)
Supplement: Supplementary file 1 [file 31771396]

# 3D Nano-conductive Network Based on the Micro-structure of Latex Foam for Superior Performance Piezoresistive Sensors

*Wang Zhang<sup>a, †</sup>, Liwei Lin<sup>a, b, †</sup>, Ligong Zhang<sup>a</sup>, Yuping Wang<sup>a</sup>, Yu Zhuang<sup>c</sup>, Yejung Choi<sup>b</sup>, Youngseul Cho<sup>b</sup>, Tianyu Chen<sup>b</sup>, Hang Yao<sup>\* a</sup>, Yuanzhe Piao<sup>\* b, d</sup>*

<sup>a</sup> School of Chemistry and Chemical Engineering, Yangzhou University, Yangzhou, Jiangsu, 225002, China

<sup>b</sup> Department of Applied Bioengineering, Graduate School of Convergence Science and Technology, Seoul National University, 145 Gwanggyo-ro, Yeongtong-gu, Suwon-si, Gyeonggi-do, 443-270, Republic of Korea

<sup>c</sup> College of Materials Science and Engineering, Beijing University of Chemical Technology, Beijing, 100029, China

<sup>d</sup> Advanced Institutes of Convergence Technology, 145 Gwanggyo-ro, Yeongtong-gu, Suwon-si, Gyeonggi-do, 443-270, Republic of Korea

**\*Corresponding Author:**

Yuanzhe Piao: parkat9@snu.ac.kr

Hang Yao: yaohang@yzu.edu.cn

**Author contributions**

<sup>†</sup> These authors devoted equally to this work and should be considered as co-first authors.

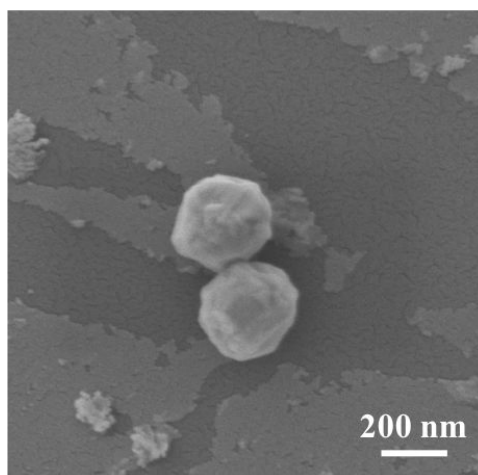

**Figure S1.** The SEM image of Ag nanoparticles.

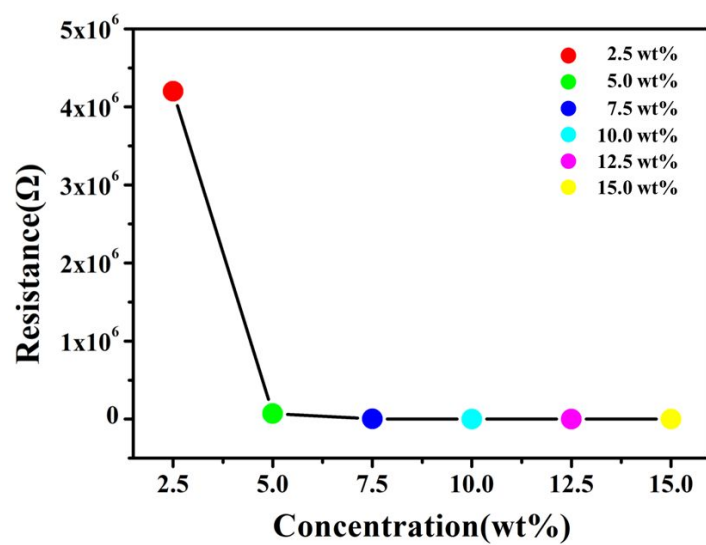

**Figure S2.** The resistances of NRLF/PDA/AgNP prepared by silver nitrate solutions of different concentrations (2.5wt%, 5wt%, 7.5wt%, 10wt%, 12.5wt%, 15wt%).

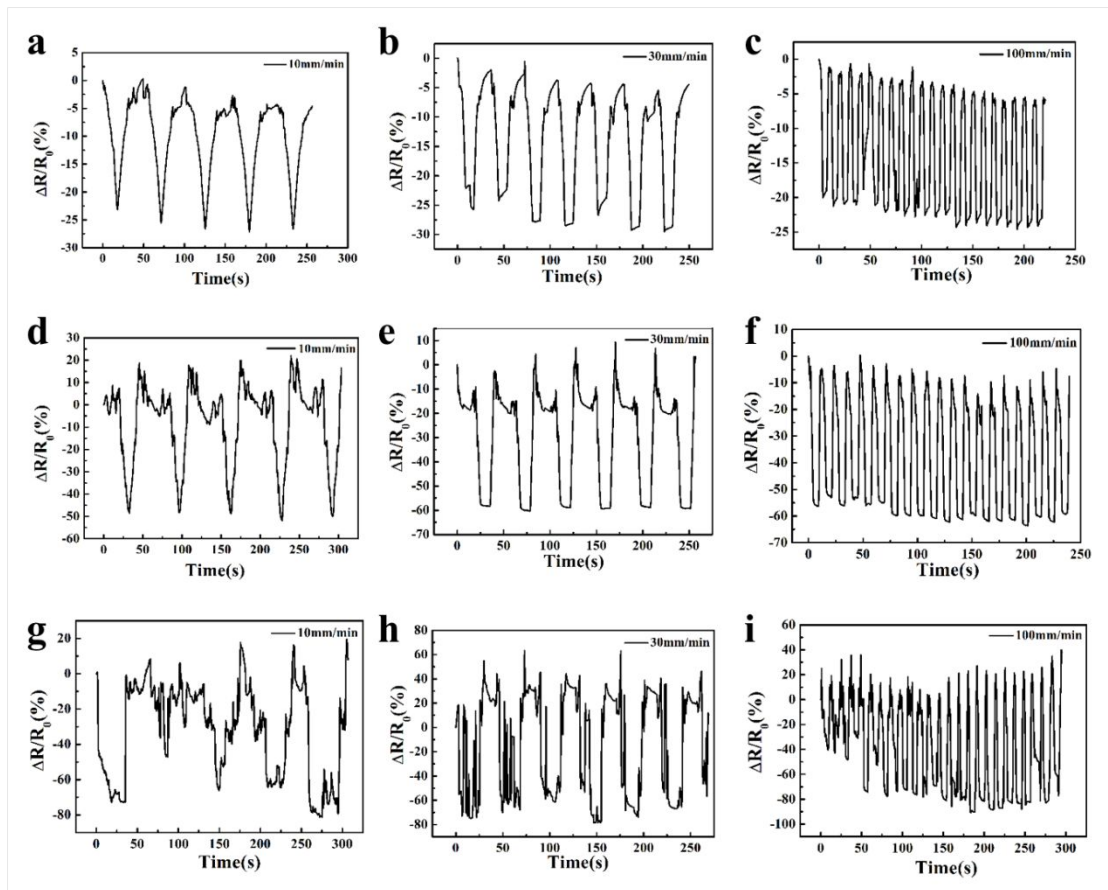

**Figure S3.** The resistance changes of NRLF/PDA/AgNP piezoresistive sensors prepared with different concentrations of silver nitrate solutions at different rates (10 mm/min, 30 mm/min, and 100 mm/min): (a-c) 10wt%, (d-f) 12.5wt%, and (g-i) 15wt%.

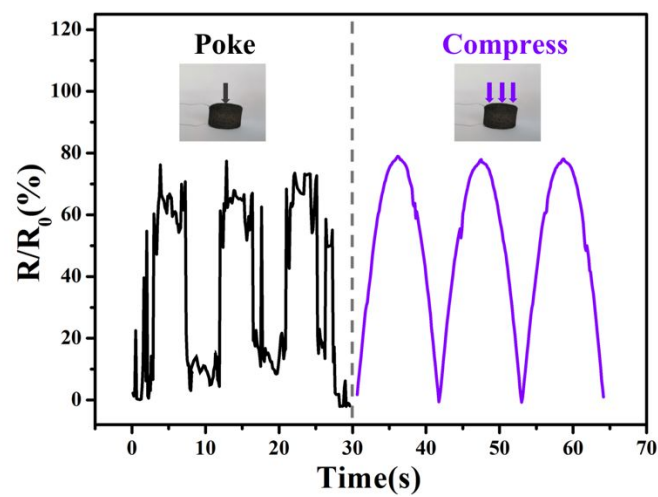

**Figure S4.** Piezoresistive behaviors of NRLF/PDA/AgNP sensor towards poking and compressing.
